# Supplementary material for: Dipalmitoylphosphatidic acid inhibits breast cancer growth by suppressing angiogenesis via inhibition of the CUX1/FGF1/HGF signalling pathway
Source: PubMed Central journal article supplement (PMC6156235; doi:10.1111/jcmm.13727), 2018-07-16

## Supplementary Figures

### Supplementary Figure Legends

#### **Supplementary Figure 1. DPPA suppresses tumor growth and angiogenesis in**

**xerograph luminal-like breast cancer mice model.** (A) The MCF-7 cells ( $10^6$  cells) were subcutaneously inoculated in the second right mammary fat pad area of BALB/c athymic nude mice. The mice were treated with DPPA (3 mg/kg body weight) or the same concentration of DMSO once every two days for 10 days through intravenous tail injection at 7 days after cell inoculated. The tumor volume was significantly smaller in DPPA-treated mice.  $n=8$ ,  $**P<0.01$ ,  $*** P<0.001$ . (B) The tumors were isolated and weighted after treated. Tumor weight was markedly lighter while DPPA treated than DMSO treated.  $n=8$ ,  $*** P<0.001$ . (C) IHC staining for blood vessels using CD31 on tumor tissues sections. The CD31-positive staining in DMSO treated tumor tissues was more than that in DPPA treated. Scale bars 50  $\mu\text{m}$ . (D) The statistical analysis of IHC staining for CD31 showed that DPPA significantly inhibit MVD in tumor tissues.  $** P<0.01$ .

#### **Supplementary Figure 2. DPPA inhibits angiogenesis and tumor growth in a chick embryo CAM experimental luminal-like breast cancer model.**

MDA-MB-231 cells were cultured on the 10-day-old chick embryo CAM and incubated for 48 h, then treated with DMSO or DPPA (2  $\mu\text{M}$ , 4  $\mu\text{M}$  or 8  $\mu\text{M}$ ) and further incubated for 48 h. (A) Representative images of xenograft tumors on CAM treated with DMSO or DPPA. Scale bars 500  $\mu\text{m}$ . (B) Higher magnification of A. Fewer blood vessel plexus in the DPPA-treated tumor tissue than that in the DMSO-treated group. Scale bars 100  $\mu\text{m}$ . (C) Representative H&E staining of tumor tissues on CAMs. Abundant blood vessels can be seen in DMSO-treated tumor tissues than that in DPPA-treated tumor tissues. Scale bars 100  $\mu\text{m}$ . Statistical analysis of

microvascular density (MVD) and tumor volume of DMSO- and DPPA-treated tumor tissues that implanted on CAMs (**D and E**). The MVD were decreased and tumors were much smaller in DPPA-treated group than that in DMSO-treated group. \* $P < 0.05$ , \*\*  $P < 0.01$ , \*\*\*  $P < 0.001$ .

### Supplementary Figure 1

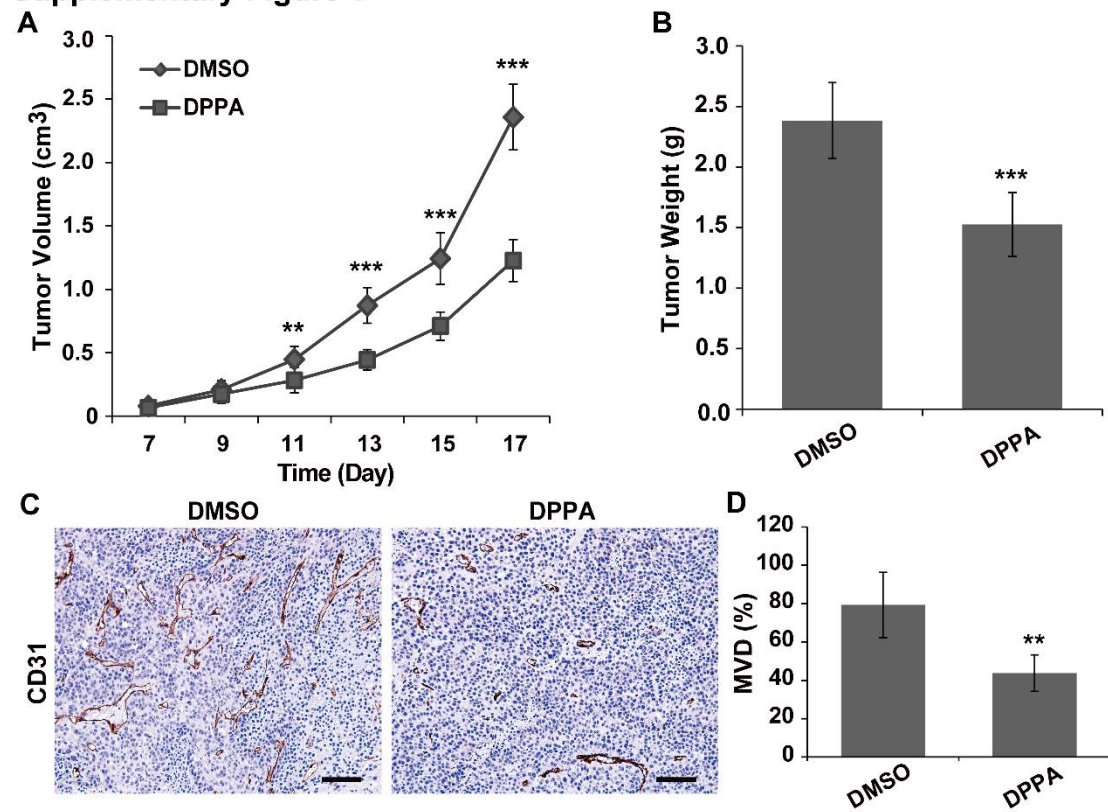

Supplementary Figure 2

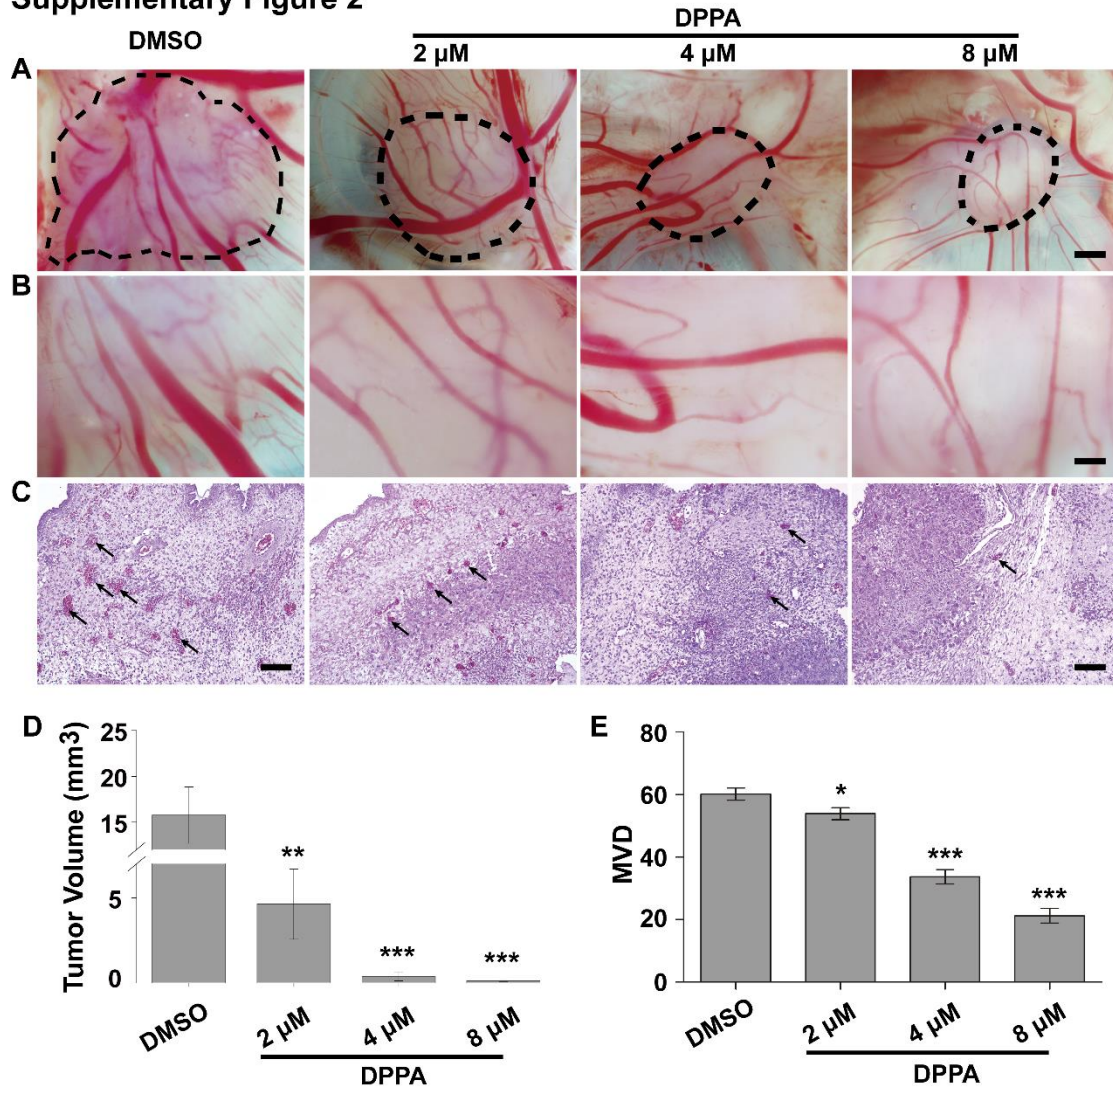

Supplement: JCMM-22-4760-s001.pdf [file JCMM-22-4760-s001.pdf]
